# Supplementary material for: ATHB17 enhances stress tolerance by coordinating photosynthesis associated nuclear gene and ATSIG5 expression in response to abiotic stress
Source: PubMed Central journal article supplement (PMC5371990; doi:10.1038/srep45492), 2017-03-30
Supplement: srep45492-s1.pdf [file srep45492-s1.pdf]

## Supplemental Information for

### ***ATHB17* enhances stress tolerance by coordinating photosynthesis associated nuclear gene and *ATSIG5* expression in response to abiotic stress**

Ping Zhao†, Rong Cui†, Ping Xu, Jie Wu, Jie-Li Mao, Yu Chen, Cong-Zhao Zhou, Lin-Hui Yu\* and Cheng-Bin Xiang\*

#### **Fig. S1. Identification of *ATHB17* OX and KO.**

(A) Schematic diagram depicting the T-DNA insertion site in the *ATHB17* KO line..  
(B-C) Analysis of *ATHB17* transcript levels in the *ATHB17* overexpression and mutant lines by semi-RT-PCR (B) and qRT-PCR (C). *TUBULIN* (*TUB*) was used as the internal control for semi-RT-PCR analysis. *UBQ5* was used as the internal control for qRT-PCR. Values are the mean  $\pm$  SD of three replicates.

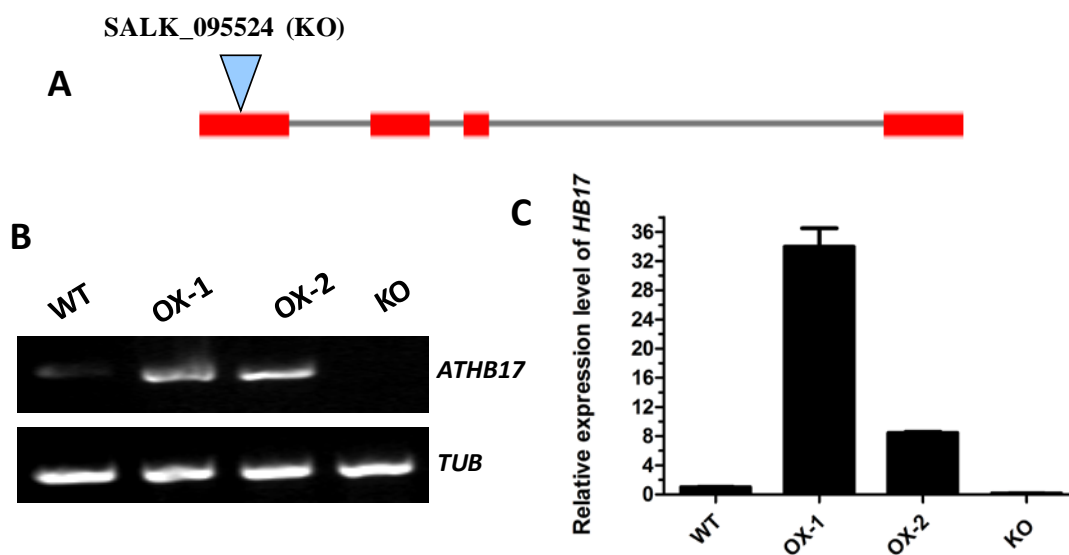

**Fig. S2. Salt tolerance assay in soil.**

(A-B) Salt tolerance assay of WT and *ATHB17* KO plants. Three-week-old plants were irrigated with 200 mM NaCl solution for 2 weeks (A); the survival ratios were recorded (B). Values are the mean  $\pm$  SD of three replicates each containing 7-8 plants per genotype (\*\**P* < 0.001).

(C-D) Salt tolerance assay of WT and *ATHB17*-overexpressing plants. Four-week-old plants were irrigated with 300 mM NaCl solution for 2 weeks (A), and the survival ratios were recorded (B). Values are the mean  $\pm$  SD of three replicates each containing 6 plants per genotype (\*\**P* < 0.01).

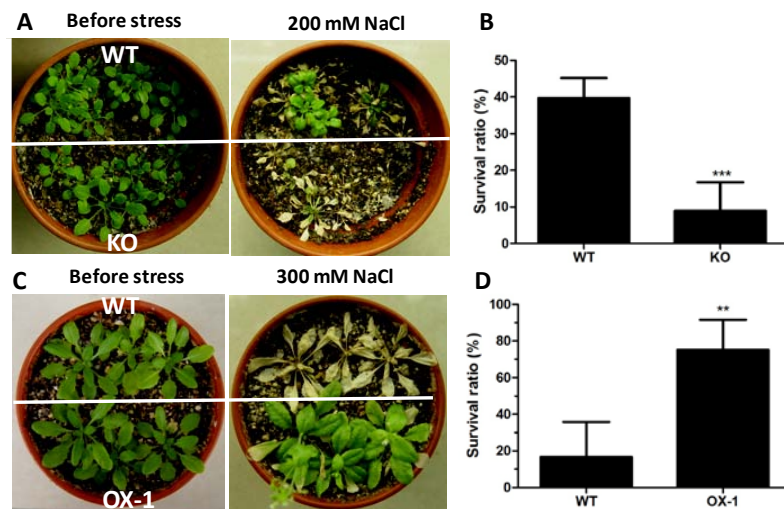

**Fig. S3. Functional complementation assay.**

Seeds of WT, *ATHB17* KO and the complementation line (FC) germinated and grown vertically on MS medium or MS medium supplemented with 140 mM NaCl. FC lines were obtained by overexpression of *ATHB17* using 35S::*ATHB17* construct in *ATHB17* KO background.

(A) Salt tolerance of WT, *ATHB17* KO and the complementation line (FC).

(B) Relative expression of *ATHB17* in WT, *ATHB17* KO and the complementation line quantified by qRT-PCR. Values are the mean  $\pm$  SD of three replicates

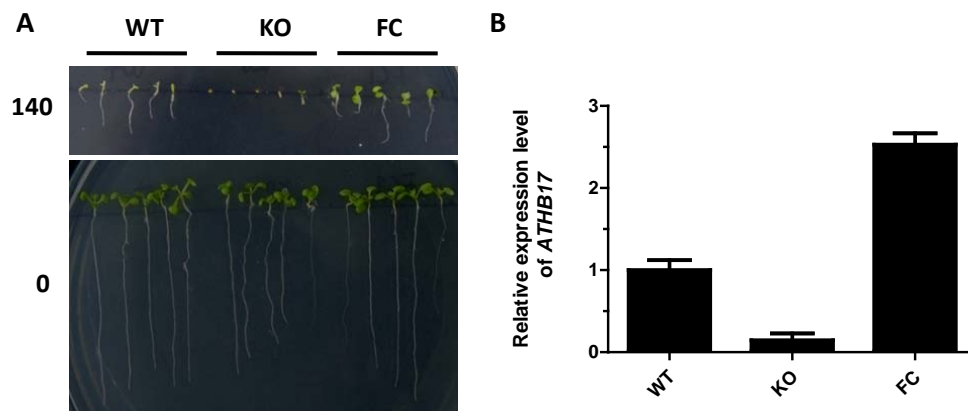

**Fig. S4. Overexpression of *ATHB17* improved salt tolerance of tobacco plants.**

(A) *ATHB17* expression level in the transgenic tobacco plants by semi-RT-PCR analysis. *NtACTIN1* was used as the internal standard control.

(B-C) Salt tolerance assay of the *ATHB17*-expressing tobacco plants. Seeds of WT and *ATHB17*-overexpressing tobacco lines were germinated and grown on MS medium or MS medium containing NaCl for 14 days (B) before primary root length was measured (C). Values are the mean  $\pm$  SD (n = 30, \*\*P < 0.01, \*\*\*P < 0.001).

(D) WT and *ATHB17*-overexpressing tobacco plants cultured by hydroponic growth method. Twenty-day-old seedlings were transferred to hydroponic culture with MS hydroponic solution (control) or MS hydroponic solution containing 100 mM NaCl for 20 days.

(E) Fresh weight of the hydroponic culture tobacco plants. Values are the mean  $\pm$  SD (n = 8, \*P < 0.05, \*\*P < 0.01).

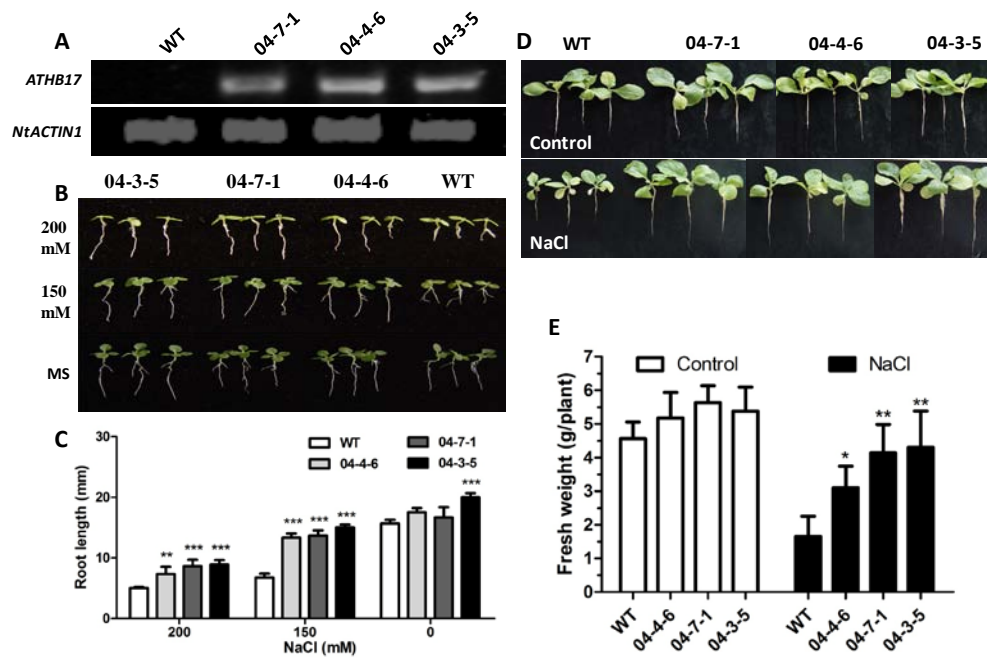

**Fig. S5. Oxidative and drought stress tolerance assay of *ATHB17*-overexpressing and knockout plants.**

(A-B) Oxidative stress tolerance assay. Seeds were germinated and grown on MS medium or MS medium containing 2  $\mu$ M paraquat for 7 days (A). The ratio of plants showing green cotyledons on MS or paraquat medium is shown (B). Values are the mean  $\pm$  SD of three replicates each containing 36 plants per genotype (\*P < 0.05, \*\*P < 0.01).

(C-D) Drought tolerance assay. Three-week-old plants grown in the same condition were used for drought tolerance assay. Plants were not watered for 13 days, and then re-watered (C); after 1 day recovery, the survival ratios were recorded (D). Values are the mean  $\pm$  SD of three replicates each containing 15 plants per genotype (\*P < 0.05).

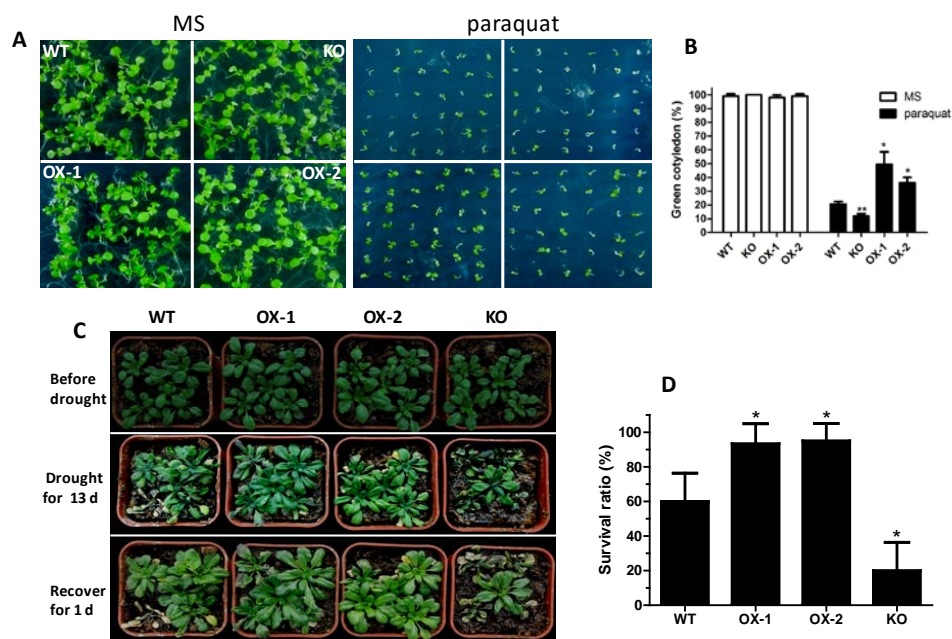

**Fig. S6. ATHB17 binding to the HD-binding *cis*-elements.**

(A) HB17 $\Delta$ 107 protein in yeast has no self-activation activity. The empty pAD and pHis2 were used as negative control. (B) Y1H assay in yeast strain Y187. The two vectors AD-HB17 $\Delta$ 107 and BD/3 $\times$  HD-binding *cis*-element were transformed into Y187. Empty pAD and pHis2 were used as negative control. Serial yeast dilutions (1:1, 1:10, 1:100 and 1:1,000) were grown on different SD medium for 5 days. (C) Identification of 17 ATHB17 binding *cis*-elements by EMSA. (D) Validation of the binding activity of ATHB17 to the HD-binding *cis*-element ttttaattt by EMSA. For the competition test, non-labeled probe and non-specific probes were added into the binding reaction.

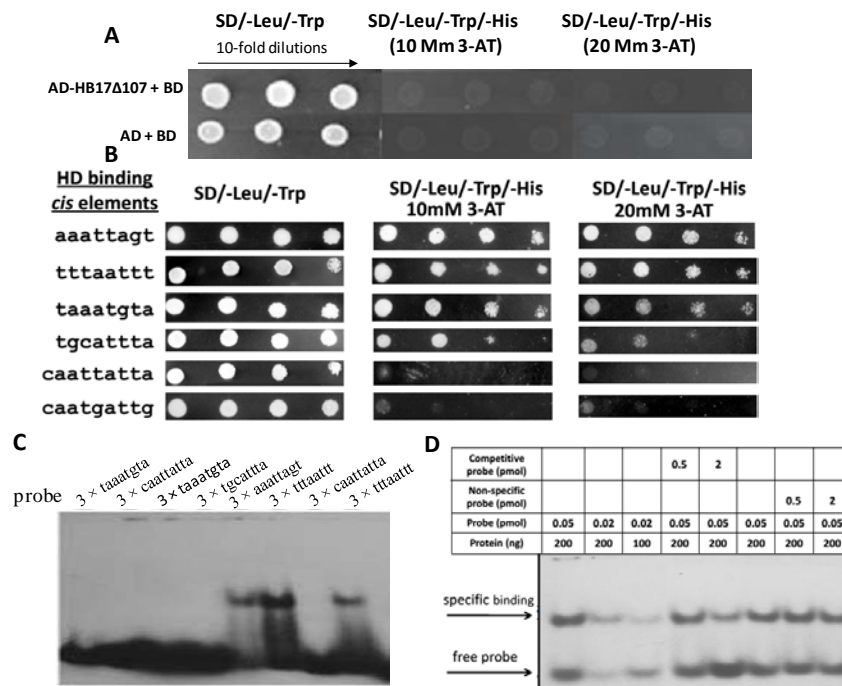

**Fig. S7. Identification of *ATSIG5*-overexpressing lines and knockout lines.**

(A) Schematic diagram depicting the T-DNA insertion site in the *ATSIG5* knockout lines. (B) Analysis of *ATSIG5* transcript levels in the *ATSIG5* overexpression and knockout lines by qRT-PCR. *UBQ5* was used as the internal control. Values are the mean  $\pm$  SD of three replicates.

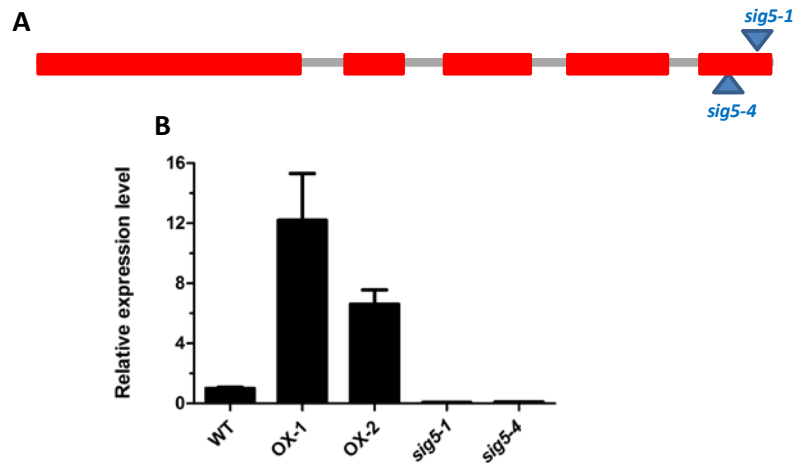

**Supplementary Table 1. Primer sequences used in this study.**

| <b>Primer Name</b>        | <b>Sequence (5'-3')</b>                                                                    |
|---------------------------|--------------------------------------------------------------------------------------------|
| SALK_095524-LP            | CGGGATTAAGGGTATGATTCTG                                                                     |
| SALK_095524-RP            | TCCATTTCACTGATTGACACG                                                                      |
| SALK_049021-LP            | TGACCATTCTCTAGTGTACGCC                                                                     |
| SALK_049021-RP            | AGATGTTGATGGTGTGGAGC                                                                       |
| SALK_101921-LP            | CCATTCTCTAGTGTACGCCAC                                                                      |
| SALK_101921-RP            | GTTTGAGATGGGAAGACCTCC                                                                      |
| LBb1.3                    | ATTTTGCCGATTCGGAAC                                                                         |
| <i>ATHB17</i> -attb-LP    | GGGGACAAGTTTGTACAAAAAAGCAGGCTATG<br>ATAAACTACTATTTACGTACA                                  |
| <i>ATHB17</i> -attb-RP    | GGGGACCACTTTGTACAAGAAAGCTGGGT<br>TCAACGATCACGCTCTTGCG                                      |
| <i>ATHB17</i> -HA-attb-LP | GGGGACAAGTTTGTACAAAAAAGCAGGCT<br>atgtaccatac gatgtccagattacgctATGATAAACTACTA<br>TTTACGTACA |
| p <i>ATHB17</i> -LP       | CTCATTGACACTGCTTGTGCCT                                                                     |
| p <i>ATHB17</i> -RP       | AGAAAGACATAACCAAAGTAAATTA                                                                  |
| <i>ATHB17</i> -attb-LP2   | GGGGACAAGTTTGTACAAAAAAGCAGGC<br>TTAGTGGTAGCTTTATGCTTCTTAC                                  |
| <i>ATHB17</i> -attb-RP2   | GGGGACCACTTTGTACAAGAAAGCTGGGT<br>ACGATCACGCTCTTGCGGCGGA                                    |
| <i>ATSIG5</i> -attb-LP    | GGGGACAAGTTTGTACAAAAAAGCAGGCTATGG<br>GAGTTG TGTCTATTTCAAGT                                 |
| <i>ATSIG5</i> -attb-RP    | GGGGACCACTTTGTACAAGAAAGCTGGGTTTAG<br>ACGATGTATT GACGAAGGTA                                 |
| COR47 qRT-PCR LP          | GAAACCTCAAGAGACAACGACG                                                                     |
| COR47 qRT-PCR RP          | CATCGCTCGAAGAGGAAGAAGA                                                                     |
| RD22 qRT-PCR LP           | CTGTTTCCA CTGAGGTGGCTAA                                                                    |
| RD22 qRT-PCR RP           | GTGGCAGTAGAACACCGCGAA                                                                      |
| NCED3 qRT-PCR LP          | GCTGCGGTTTCTGGGAGAT                                                                        |
| NCED3 qRT-PCR RP          | GTCGGAGCTTTGAGAAGACGAT                                                                     |
| ABI5 qRT-PCR LP           | CAGCTGCAGGTTACATTCTG                                                                       |
| ABI5 qRT-PCR RP           | CACCCTCGCCTCCATTGTTAT                                                                      |
| CBF1 qRT-PCR LP           | CGATAGTCGTTTCCATTTTTGTACT                                                                  |
| CBF1 qRT-PCR RP           | CCACTCGTTTCTACAACAATAAAAT                                                                  |
| ABA1 qRT-PCR LP           | GATGCAGCAAATATGGGTCAAG                                                                     |
| ABA1 qRT-PCR RP           | CCATTGCATGGATAATAGCGACT                                                                    |
| RD29A qRT-PCR LP          | CCTGAAGTGATCGATGCACCAG                                                                     |
| RD29A qRT-PCR RP          | TGGTGTAATCGGAAGACACGAC                                                                     |
| RD29B qRT-PCR LP          | GTGAAGATGACTATCTCGGTGG                                                                     |



|                   |                           |
|-------------------|---------------------------|
| RD29B qRT-PCR RP  | CACCACTGAGATAATCCGATCC    |
| ABI1 qRT-PCR LP   | CGGCAAAACTGCACTTCCATT     |
| ABI1 qRT-PCR RP   | CACGAGCTCCATTCCACTGAA     |
| UBQ5 qRT-PCR LP   | AGAAGATCAAGCACAAAGCAT     |
| UBQ5 qRT-PCR RP   | CAGATCAAGCTTCAACTCCT      |
| SIG5 qRT-PCR LP   | GTTCAGCTGCAAGATCTCCACTCGG |
| SIG5 qRT-PCR RP   | GGGGTTTTACAAGGCTTTCTCCTCG |
| ATHB17 qRT-PCR LP | AAGGAAGTGGCGGAGGAAG       |
| ATHB17 qRT-PCR RP | TTTCGCGGAGGAGCAGA         |
| LHB1B1 qRT-PCR LP | CGACAATGGCTCTCTCCTCT      |
| LHB1B1 qRT-PCR RP | GGCTTGAGGCTTTGCGCAT       |
| LHB1B2 qRT-PCR LP | GTGAAGCCTGCCGCATCAGA      |
| LHB1B2 qRT-PCR RP | CCCTTTGGCTTGGCGACAGT      |
| CAB1 qRT-PCR LP   | GCTTCGTGAGTGTGAGAGGA      |
| CAB1 qRT-PCR RP   | CCAATTTGGTAATTGCCAGAT     |
| PSAF qRT-PCR LP   | GCTCTTGCTCTCAATGCTCA      |
| PSAF qRT-PCR RP   | GGTCTCCGTTCACTATCAAGT     |
| PSAD-1 qRT-PCR LP | CGCAACCTCCGGCGTCAAGA      |
| PSAD-1 qRT-PCR RP | GCAGCGGCGGCGGAGGAAT       |
| LHCB5 qRT-PCR LP  | GGGCAGTTTCAAGATCGTCT      |
| LHCB5 qRT-PCR RP  | CCTTGGACTIONTAGCAGGAGCT   |
| LHCB3 qRT-PCR LP  | CACGAGCTCAAGCAGTGTTT      |
| LHCB3 qRT-PCR RP  | CGAGAGAGACAACATCACGA      |
| PSBO1 qRT-PCR LP  | CTCGCGGAAGTTCTCACCT       |
| PSBO1 qRT-PCR RP  | CGAGCCGAGGAAGTTTCGA       |
| LHCA2 qRT-PCR LP  | CGCTGCCATTTCTTCTCCAA      |
| LHCA2 qRT-PCR RP  | CCAGATTGGTCTATCTGGAT      |
| LHCB6 qRT-PCR LP  | CGGATTCTCAATCGGTTGAGT     |
| LHCB6 qRT-PCR RP  | CCCAACGGATCGAAGAATCTC     |
| CAB3 qRT-PCR LP   | CAGTCTTTTGAATTCGAGTGA     |
| CAB3 qRT-PCR RP   | GACAAATCATACAAAGTCTTGC    |
| PSAH2 qRT-PCR LP  | CCCCAATTCTATGAACCCTA      |
| PSAH2 qRT-PCR RP  | GTAGCAGACTTGAAATGCAAT     |
| LHCA5 qRT-PCR LP  | CCATCGTCGTGACGCTTCAT      |
| LHCA5 qRT-PCR RP  | GATAAGGAGGAGGGTTTAGT      |
| PSAH1 qRT-PCR LP  | CCTACACAAAATTCCCACTC      |
| PSAH1 qRT-PCR RP  | CGGTTGCAAGAGACGCCAT       |
| LHCA4 qRT-PCR LP  | CCTTGTACTIONTCAAAGCCAAGA  |
| LHCA4 qRT-PCR RP  | CCTTTCTTAGCTTCAACCTT      |
| PPL1 qRT-PCR LP   | GATGCATCAGAGCATGATGT      |
| PPL1 qRT-PCR RP   | CGAGTGTAGTTTCTAGCTTG      |

|                       |                           |
|-----------------------|---------------------------|
| FAD6 qRT-PCR LP       | GCTGACAGTGCAGAAGACA       |
| FAD6 qRT-PCR RP       | GGGAAGTGTATCCATGATAT      |
| CAB3 ChIP qPCR P1     | CAGTAAACTACGAATGATAGCT    |
| CAB3 ChIP qPCR P2     | GTAGAGATGAAAAACCACAACA    |
| CAB1 ChIP qPCR P1     | GCATTTACCCACACATAAATATC   |
| CAB1 ChIP qPCR P2     | CTTCGATAAAGAGTAAAACGTCA   |
| CAB1 ChIP qPCR P3     | CCTTTGGTCAACTAGGAAGTT     |
| CAB1 ChIP qPCR P4     | GACCTGACCTTGAATCTATATT    |
| LHB1B2 ChIP qPCR P1   | GATGAAATTGGATAGCTAGGTT    |
| LHB1B2 ChIP qPCR P2   | CAACCAATAGAAATCAAGGCAT    |
| LHB1B1 ChIP qPCR P1   | GCTAAGATGCTACGAGATATCT    |
| LHB1B1 ChIP qPCR P2   | GGGTATTTATAACGTACATATGA   |
| PSAH-1 ChIP qPCR P1   | GACACAACGGTAATCGAACTT     |
| PSAH-1 ChIP qPCR P2   | GCAAGTTCCTGAATCACGT       |
| PSAH-1 ChIP qPCR P3   | GGAGCGATAACTATTGGTTGT     |
| PSAH-1 ChIP qPCR P4   | CGGGAAAAGAAGAGAAGTTGT     |
| PPL1 ChIP qPCR P1     | GAAACTGTGCGTTTTGGTTAC     |
| PPL1 ChIP qPCR P2     | CCACTTTTGAACTTCCTGAC      |
| LHCA2 ChIP qPCR P1    | GCTTGTATGCATATCATCTCAT    |
| LHCA2 ChIP qPCR P2    | GGGTTTAAAGTAGGGTATATAG    |
| FAD6 ChIP qPCR P1     | GGACTTTTCATGTGAAGCTTA     |
| FAD6 ChIP qPCR P2     | CGGAATGAAGAGAATGATACGT    |
| LHCB3 ChIP qPCR P1    | CCAATCTCTGACATCACAACG     |
| LHCB3 ChIP qPCR P2    | GCCTCATTCATCAACAACGTAA    |
| PSBO1 ChIP qPCR P1    | GCCTTCTTTGCATCTACTACTT    |
| PSBO1 ChIP qPCR P2    | GCTCTAACCAACTGAGCTAAT     |
| PSBO1 ChIP qPCR P3    | CCTCTAGTATTGGCATTCTTAC    |
| PSBO1 ChIP qPCR P4    | GATGCTGTTCTAAGTATACAG     |
| PSBO1 ChIP qPCR P5    | CCGAATCAAACCTAAGTCTCT     |
| PSBO1 ChIP qPCR P6    | CGATCAAAGATTAATATGCCGA    |
| SIG5 ChIP qPCR I LP   | cggatgctttacatggtgat      |
| SIG5 ChIP qPCR I RP   | agagtttataacttaacgacacta  |
| SIG5 ChIP qPCR II LP  | ctgatggaatggtttaatgtt     |
| SIG5 ChIP qPCR II RP  | aaaatagtaataaaatgaaaagtgc |
| SIG5 ChIP qPCR III LP | cgtgaaccagaatctaaaatcga   |
| SIG5 ChIP qPCR III RP | gaaagatctaatcaagacgaagt   |
| NtACTIN1 RT-PCR LP    | ATGGCAGACGGTGAGGATATTCA   |
| NtACTIN1 RT-PCR RP    | GCCTTTGCAATCCACATCTGTTG   |
|                       |                           |

| DNA fragments used for Y1H |                                      |
|----------------------------|--------------------------------------|
| FDA6 HD-binding cis b LP   | CagatttcttttaattcatttcaA             |
| FDA6 HD-binding cis b RP   | CGCGT tgaaatgaaattaaaaagaaatct GAGCT |
| FDA6 HD-binding cis a LP   | CctcaaaacaattagtgatctaaaaA           |
| FDA6 HD-binding cis a RP   | CGCGTttttagatcactaattgtttgagGAGCT    |
| LHCA2 HD-binding cis c LP  | CgatgatcaaattaaagcatattagA           |
| LHCA2 HD-binding cis c RP  | CGCGTctaataatgccttaattgatcatcGAGCT   |
| LHB1B1 HD-binding cis d LP | CgagataagcaaattaaatctcaagA           |
| LHB1B1 HD-binding cis d RP | CGCGTcttgaagatttaattgcttatctcGAGCT   |
| LHB1B2 HD-binding cis e LP | CctcgatcacaataaaactcacttA            |
| LHB1B2 HD-binding cis e RP | CGCGTaaagtgagtttaattgtgatcgagGAGCT   |
| PSBO1 HD-binding cis h LP  | CggttattcgtttaattcgtttgaaA           |
| PSBO1 HD-binding cis h RP  | CGCGTtcaaacgaaattaaacgaataaccGAGCT   |
| PSBO1 HD-binding cis g LP  | CgattaagattttaattatcaggaA            |
| PSBO1 HD-binding cis g RP  | CGCGTtctgataaataaaatcttaacGAGCT      |
| PSBO1 HD-binding cis f LP  | CtgaataataatttaccatttaagtA           |
| PSBO1 HD-binding cis f RP  | CGCGTacttaaatgtaaatttaatttcaGAGCT    |
| LHCB3 HD-binding cis i LP  | CgaagaagagaaattagtactaaciaA          |
| LHCB3 HD-binding cis i RP  | CGCGTttgttagtactaattctctcttcGAGCT    |
| PSAH-1 HD-binding cis j LP | CaactaaataaataaaagttcaagA            |
| PSAH-1 HD-binding cis j RP | CGCGTcttgaactttaattatttagttGAGCT     |
| CAB1 HD-binding l LP       | CcactaccagtttaattcaattatgA           |
| CAB1 HD-binding cis l RP   | CGCGTcataattgaaattaaactggtagtgGAGCT  |
| CAB1 HD-binding cis k LP   | CcacaagtaatttaattataaggaaA           |
| CAB1 HD-binding cis k RP   | CGCGTtccctataaataaattactgtgGAGCT     |
| CAB3 HD-binding cis m LP   | CttgttgcaataaaaccttaaciaA            |
| CAB3 HD-binding cis m RP   | CGCGTttgttagagtttaattgcaaciaGAGCT    |
| PPL1 HD-binding cis n LP   | CcatttttgcaattagtgtttttA             |
| PPL1 HD-binding cis n RP   | CGCGTaaaaaacactaattgcaaaaatgGAGCT    |
| SIG5 HD-binding cis 1 LP   | CcacaccatcaaattagttagacctA           |
| SIG5 HD-binding cis 1 RP   | CGCGTtaggtctaactaattgatgggtgGAGCT    |
| SIG5 HD-binding cis 2 LP   | CaagtgtcttaatttagattgtaA             |
| SIG5 HD-binding cis 2 RP   | CGCGTtacaactctaaaataaagacacttGAGCT   |
| SIG5 HD-binding control LP | CttactcttaccattacgtaacttA            |
| SIG5 HD-binding control RP | CGCGTaaagtttacgtaaatgtaagagtaaGAGCT  |
